# Supplementary material
Source: PubMed Central journal article supplement (PMC6140528)
Supplement: pnas.1718511115.sapp.pdf [file pnas.1718511115.sapp.pdf]

# SI Appendix

Zhang et al.

## Protocols:

**Formation of individual DNA origami raft.** The mixture of staple strands, modified strands (leg sticky ends, biotinylated staples for function rafts only, horizontal sticky ends) and single-stranded M13mp18 DNA genome was diluted in  $1\times$  TAE/ $Mg^{2+}$  buffer (40 mM Tris-HCl, pH 8.0, 20 mM acetic acid, 2.5 mM EDTA and 12.5 mM magnesium acetate). The final concentration of M13mp18 DNA genome in the solution was 10 nM. The molar ratio of the M13mp18 DNA genome to each staple strand was  $\sim 1:10$ . The sample was cooled from 70 °C to 20 °C in an incubator over the course of 10 hours. The DNA origami rafts were purified afterwards using Amicon Ultra 0.5 mL centrifugal filters (100K, Millipore). The concentration of the DNA origami rafts was measured using NanoPhotometer P300 (Implen GmbH).

**Patch sticky-end functionalization on DNA origami rafts.** The biotinylated DNA origami rafts (functional raft a/b) and fluorescent streptavidin (Alexa Fluor®, Thermo Fisher) were mixed at a ratio of 1: 32 in  $1\times$  TAE/ $Mg^{2+}$  buffer, and incubated at room temperature for 5 hours. Then, the streptavidin functionalized DNA origami rafts were purified using Amicon Ultra 0.5 mL centrifugal filters (100K, Millipore) to remove extra streptavidin. The biotinylated strand (S36-biotin) was mixed with an equal molar amount of each arm sticky end (from cS36-Arm-a11 to cS36-Arm-c'20) in  $1\times$  TAE/ $Mg^{2+}$  buffer, and incubated at room temperature for 30 minutes to form duplexes. The six pre-annealed duplexes were then added to six batches of streptavidin functionalized DNA origami rafts at a ratio of 128: 1. The mixtures were incubated at room temperature for 3 hours, and purified using Amicon Ultra 0.5 mL centrifugal filters (100K, Millipore). The

concentrations of the final products were measured using NanoPhotometer P300 (Implen GmbH).

## DNA functionalization on emulsion droplets.

Biotinylated emulsion droplets were fabricated using the technique from L. Feng, et. al.'s paper (35). The biotinylated strand S36-biotin, strand cS36-cLeg20 and fluorescent streptavidin were mixed stoichiometrically and diluted to 0.5  $\mu$ M in 100  $\mu$ l TMS buffer (10mM Tris-HCl, pH 8.0, 3mM  $MgCl_2$ , 1mM SDS, 0.1mM  $NaN_3$ ). The sample was annealed at room temperature for 30 minutes. In the folding experiment, 5 pmol of the linker strands (Linker-a20/b20) were added to the DNA/streptavidin solution. Then, 2  $\mu$ l of creamed emulsion droplets was added to the DNA/streptavidin solution. The mixture was gently tumbled at room temperature for an hour and then washed three times to remove the excess DNA strands and streptavidin. The number density of DNA coated droplets was measured by fluorescent confocal microscopy (Leica TCS SP5).

## DNA origami patch formation on emulsion droplets.

The functional rafts were diluted to 100 pM in TMS buffer, and mixed with emulsion droplets at a ratio of 400: 1. The mixture was then diluted with TMS buffer to keep the DNA origami concentration  $\sim 50$  pM. The sample was gently tumbled at room temperature for 24 hours, and then washed to remove the unattached functional rafts. The shepherding rafts were diluted to 100 pM in TMS buffer, mixed with emulsion droplets at a ratio of 400: 1, and gently tumbled at room temperature for 12 hours. The above step was repeated twice. Then the sample was washed to remove the free DNA origami rafts in the solution. The patches on the droplets were characterized using fluorescence confocal microscopy and atomic force microscopy. To obtain 3D reconstruction from confocal Z stack, the patchy

droplets were mixed with 20% polyacrylamide gel solution (50  $\mu$ l 40% acrylamide/bis-acrylamide, 50  $\mu$ l 2 $\times$ TMS buffer, 1  $\mu$ l 10% ammonium persulfate, 0.1  $\mu$ l N,N,N',N'-Tetramethylethylenediamine) at a volume ratio of 1:1. Z-stack scanning was carried out immediately after gel polymerization.

**Self-assembly of emulsion droplets with DNA origami patches.** The droplets with various patch functionalities were mixed to form dimers (monovalent droplets), polymers (divalent droplets), or oligomers (monovalent and divalent droplets). The mixture was loaded into a capillary (#8100, VitroCom, Inc.), sealed with UV adhesives (NOA 68, Norland Products, Inc.) on a glass slide, and incubated at room temperature. The sample cell was tilted at an angle of  $\sim 70^\circ$ . This allows for the packing of the droplets in the corner of the capillary, which significantly increases the kinetics for patch-mediated, inter-droplet binding. The sample was flipped every six hours to an opposite direction, enabling packing rearrangement. Data was collected after 6, 18, 36, 54, 78, 108 and 192 hours of incubation. During each collection, regions of interest were randomly selected and the numbers of droplets used for further statistical analysis were  $\sim 5 - 10\%$  of the whole population.

**Folding and unfolding of the trimers.** Folding: The complementary linker strands (cLinker-a'20 and cLinker-b'10) were mixed at a 1:1 ratio in TMS buffer ( $\sim 0.5 \mu$ M) and incubated for 30 minutes to form duplexes. The mixture was then diluted to 10 nM in TMS buffer for further use. With the capillary containing the trimers unsealed, the linkers were injected such that the molar ratio of the linker duplexes to the sticky ends on the emulsion droplets (cLinker-a'20/b'10) ranges from 10:1 to 100:1. The capillary was re-sealed and incubated at room temperature for folding to happen. After a 4-hour incubation, the folding movies were taken using confocal fluorescent microscopy. Unfolding: After most trimers had folded, the capillary was unsealed again and an excess amount of the displacing strand DS17 (the ratio of DS17 to the linker duplex is  $\sim 10000:1$ )

was injected. The capillary was re-sealed and incubated at room temperature for another 4 hours before movie acquisition.

### Calculation and Simulation:

**Kinetics for patch binding.** We first calculated the time that it takes for two droplets with complementary patches to bind, given they are held next to each other, as shown in the figure below. Then, we calculated the average inter-droplet binding time under different conditions, demonstrating that the densely packing of droplets will speed up the binding kinetics from several months to a few hours.

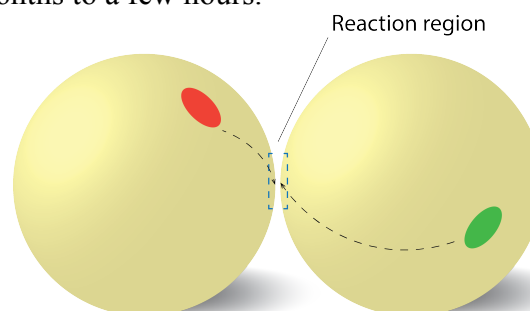

**SI Fig. 1.** A pair of droplets with complementary DNA origami patches held in contact. The two patches can diffuse on the surface. The red patch on the left droplet can bind to the green patch on the right droplet via DNA hybridization upon meeting in the reaction region.

a) When the two droplets with complementary patches are held in contact with each other, the average reaction time  $\tau_r$  is calculated as (1):

$$\tau_r = \tau_s \left(1 + \frac{\tau_b}{\tau_t}\right), \quad (1)$$

where  $\tau_s$  is the rotational search time (the average time for both patches to appear in the reaction region simultaneously);  $\tau_b$  is the binding time of two complementary patches staying in their reaction region (the area  $A_i$  can be approximated as the patch's size  $\sim 0.5 \mu\text{m}^2$ ), and  $\tau_t$  is the translational transit time of both patches staying in the reaction region before diffusing away.  $\tau_b$  can be written as  $\tau_b = \tau_h/N_G$ , where  $\tau_h$  is the hybridization time for one pair of DNA sticky ends (from 1 s to 10 s), and  $N_G$  is the average number of DNA bonds that could form when two patches stay in the

reaction region. The average number of rafts within one patch is  $\sim 50$ , among which half are functional rafts (with arm sticky ends for inter-droplet binding). There are 6 to 8 vertical sticky ends on each functional raft. Thus, the total number of the vertical sticky ends is 150 to 200. From this, we can estimate that  $N_G$  is  $\sim 100$ , and consequently,  $\tau_b \sim 0.01$  s to 0.1 s.  $\tau_t$  can be calculated from a simple equation:

$$\tau_t \sim A_i/D_{patch}. \quad (2)$$

Using  $D_{patch} \sim 0.1 \mu\text{m}^2/\text{s}$ , we get  $\tau_t \sim 1$  s. The ratio of  $\tau_b$  to  $\tau_t$  is much less than 1. The average reaction time of the two droplets with complementary patches, when held in contact with each other, is just  $\tau_s$ , indicating that the process is diffusion limited aggregation (DLA). A previous study (2) has shown the calculation of  $\tau_s$  as:

$$\tau_s = D_{rot}^{-1} \frac{2 \ln 2}{\alpha}, \quad (3)$$

where  $D_{rot}$  is the rotational diffusion coefficient, and  $\alpha$  is defined as  $A_p/4\pi R_d^2$ , the ratio of the patch's area ( $\sim 0.5 \mu\text{m}^2$ , estimated from AFM images) to the droplet's surface area. In our case, the translational diffusion coefficient of DNA origami patch  $D_{patch}$  on droplet surface is on the order of  $0.1 \mu\text{m}^2/\text{s}$  and the radius of droplet  $R = 2.35 \mu\text{m}$ , leading to  $D_{rot} \sim 0.02 \text{ s}^{-1}$ .  $D_{origami}$  is obtained from previous work (3), in which they measured the diffusion constant  $\sim 0.2 \mu\text{m}^2/\text{s}$  for a  $0.5 \mu\text{m}$  particle attached to an O/W droplet. Since the patch size in our system is slightly bigger than that, we simply took  $0.1 \mu\text{m}^2/\text{s}$  as an estimation of the patch's diffusivity. Qualitatively this checks with our observations that a patch roughly diffuses its own diameter ( $0.5 \mu\text{m}$ ) in a few seconds. Plugging all of these numbers into equation (2), we get  $\tau_s \approx 3$  hours, which is also the "conditional" reaction time  $\tau_r$ .

b) In this section we calculated the "real" reaction time  $\tau$  of two droplets with complementary patches under a more general condition (being held in contact with each other is **not** required). Considering a monolayer of droplets with a typical number density  $C_0 \sim 1500 /\text{mm}^2$  (dilute case), the reaction time can be written as the following equation:

$$\tau = \tau_d + \frac{\tau_r}{4\pi R L C_0}, \quad (4)$$

where  $L$  ( $\sim 20$  nm) is the thickness of the contact region, where patch sticky ends on the opposing droplets can reach each other. Using the measured 2D diffusion coefficient of droplets  $D_{2D} \sim 0.037 \mu\text{m}^2/\text{s}$ , we get a rough estimation of  $\tau_d \sim 3$  minutes. Plugging all the parameters into equation (4), we found the generalized reaction time is incredibly long  $\sim 4$  months.

c) To speed up the reaction, we considered an "extreme" incubation protocol: the droplets are densely packed. In this scenario, the diffusion of droplets can be neglected, and the reaction time  $\tau$  is equal to  $\tau_r$  as calculated above. Close packing, however, hinders the rearrangement of droplets, and thus, a "flipping" technique is applied.

**Monte Carlo simulation of the polymerization process.** In the experiment, complementary divalent emulsion droplets were mixed so that they bind alternately following a step growth polymerization fashion. A Monte Carlo approach was implemented to simulate this process. In the simulation, the aggregation can be written by the following equation:

$$A_i + A_j \xrightarrow{k_{ij}} A_{ij}. \quad (4)$$

Here, a constant reaction rate  $k$  was used for each  $k_{ij}$ . Thus, the characteristic aggregation time  $\tau$  can be calculated as  $1/kC_0$ , where  $C_0$  is the droplet concentration. In the experiment,  $\tau$  can be extracted from the data, which is around 20 hours. The time step of each iteration is defined as  $\Delta t = \frac{1}{kC_0 N_{1/2}} = \frac{1}{\tau N_{1/2}}$ , where  $N_{1/2}$  is half of the total number of emulsion droplets in one sample. In a typical sample cell, the length of the capillary is around 2 cm and there are about 2 to 3 layers of droplets at the corner. Thus  $N_{1/2} \approx 0.5 \times \frac{2 \text{ cm}}{5 \mu\text{m}} \times 2.5 = 5000$ , and  $\Delta t \approx 14.4$  s. The "checking points" in the experiment are: 6 hours, 18 hours, 54 hours, 108 hours and 192 hours, corresponding to 1500, 4500, 13500, 27000, 40000 iterations in the simulation, respectively.

With the system parameters set, the simulation was conducted following the steps below:

1. Assign indices to each particle (1, 2, 3, ... , N).
2. Set the degree of polymerization (DOP) of each particle to 1 (monomer)
3. Randomly pick two particles with different indices.
4. If the DOPs of both particles are non-zero, add the DOPs, and assign the updated value to particle i. Set the DOP of particle j to be zero (particle vanished). Otherwise, do not update any information (no reaction).
5. Iterate: step = step + 1, and go back to step 3
6. At each “checking point”, calculate the weight fractions of chains with various lengths.



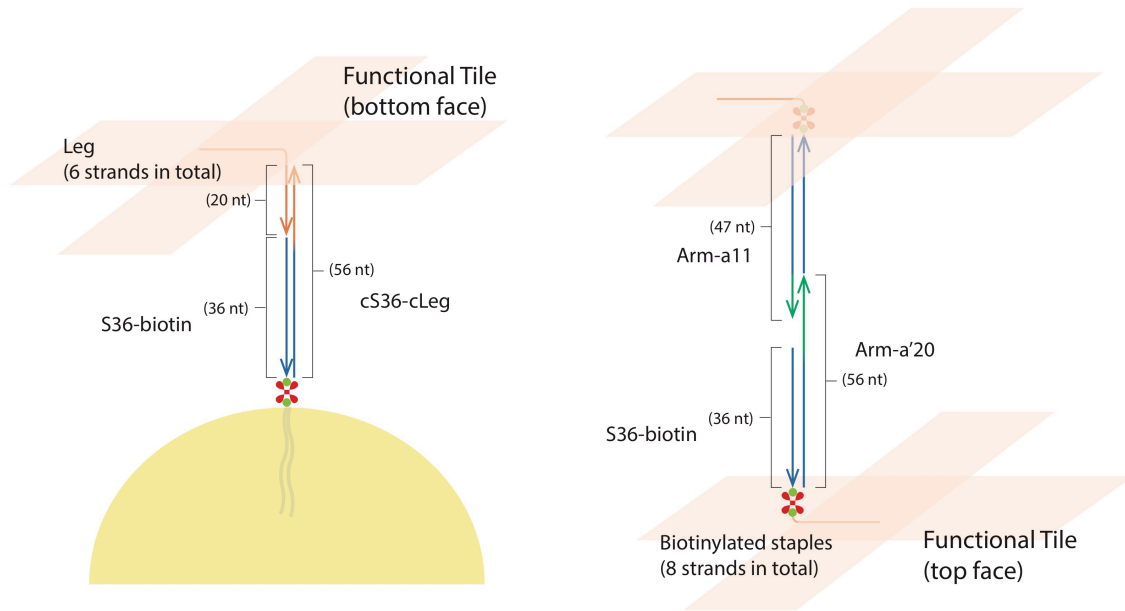

**Fig. S1.** Schematic diagram of functional DNA origami raft. Left panel: there are 6 single-stranded extensions (DNA “legs” of 20 bases) on the bottom face of the functional raft. These “legs” serve to anchor the functional raft to the complementary DNA coated emulsion droplet surface. Right panel: on the top face of the raft, fluorescent streptavidin molecules first bind to the biotin groups (8 in total) extended from the staples. Each “arm” contains two segments: a 36-nt stem that can hybridize with S36-biotin (attachment to the streptavidin molecules on the top face), and a 20-nt sticky end for patch binding.

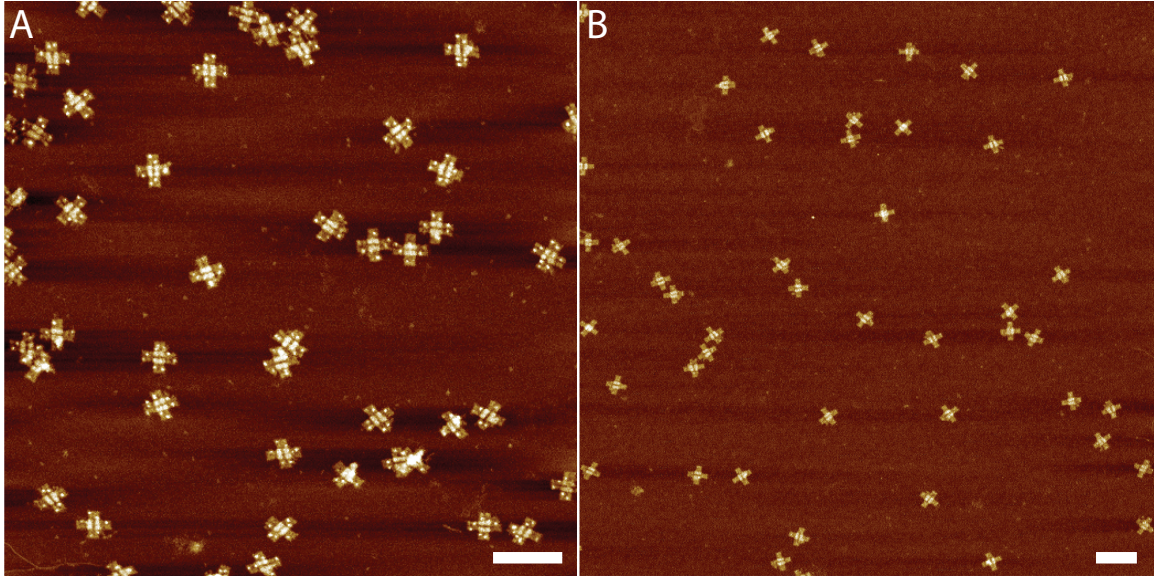

**Fig. S2.** AFM images of functional DNA origami rafts (**A**) and shepherding DNA origami rafts (**B**). Scale bars are 200 nm.

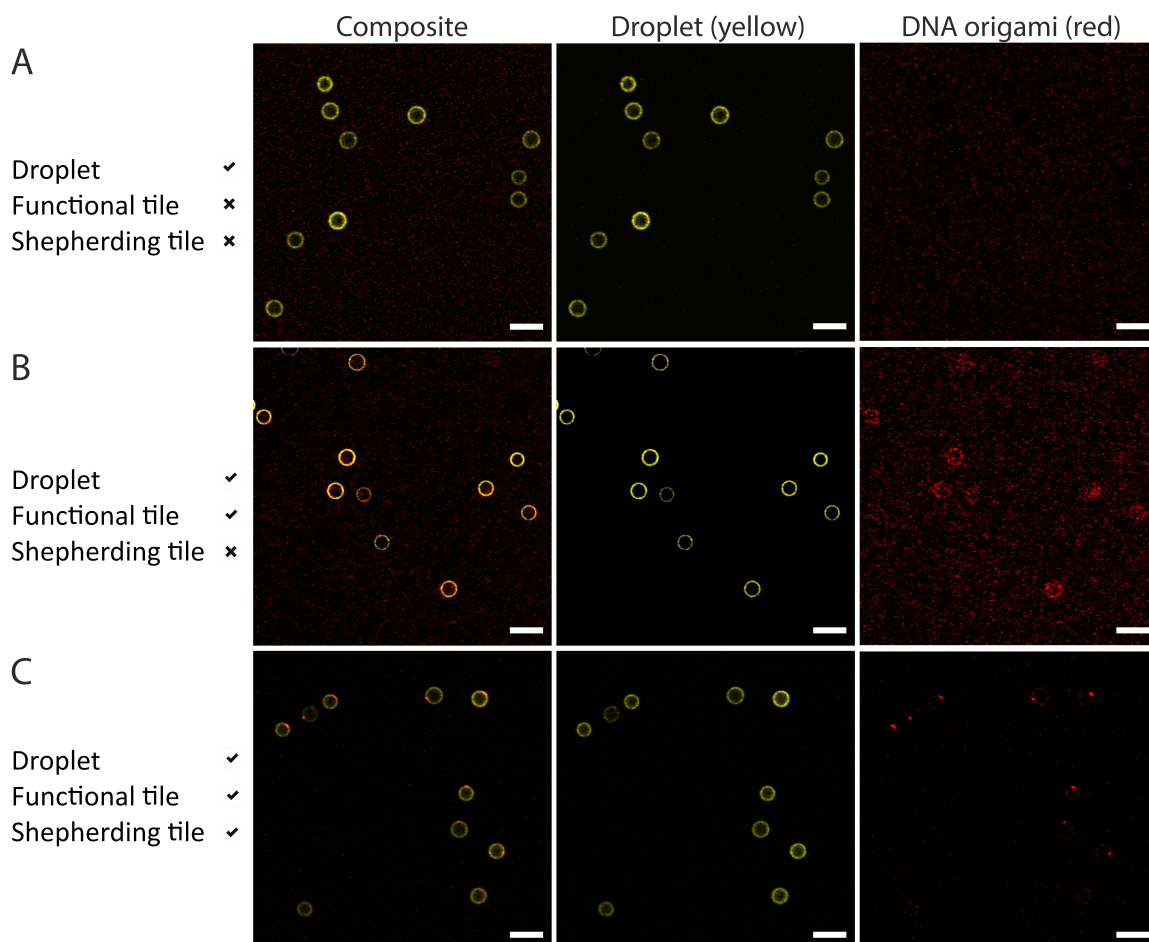

**Fig. S3.** Patch formation on DNA coated emulsion droplet surface. **(A)** Confocal images of the DNA coated droplets labeled with streptavidin Alexa Fluor® 546 (SA-AF 546) (yellow). **(B)** Confocal images of the functional rafts labeled with SA-AF 647 on droplet surface. The functional rafts (red) are attached and homogeneously distributed on the droplets as shown in the DNA origami channel. **(C)** Confocal images of patch formation on the droplets after shepherding rafts are added. The DNA origami channel shows the assembly of the functional rafts into one patch on each droplet. All scale bars are 10  $\mu\text{m}$ .

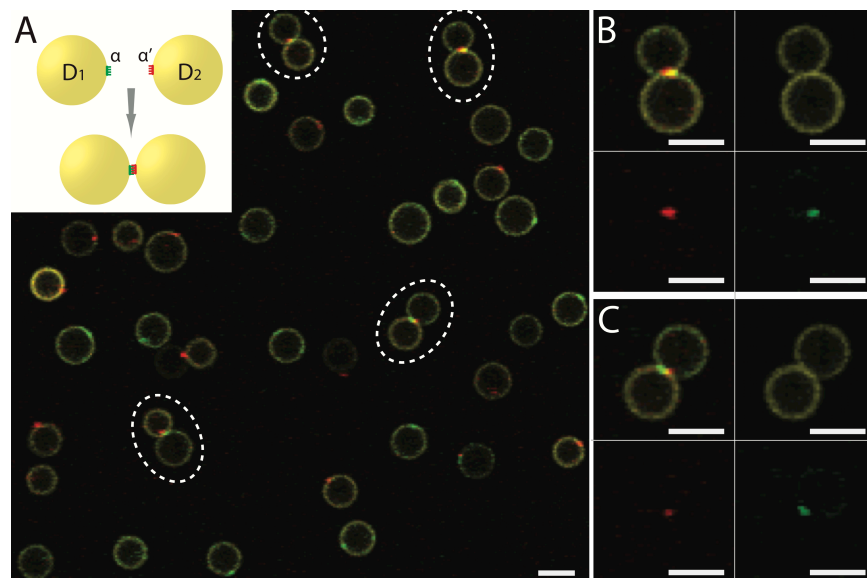

**Fig. S4. (A)** Low magnification confocal image of the dimer assembly after 12 hours. The droplets and the two complementary patches are labeled with SA-AF 546 (yellow), 488 (green) and 647 (red), respectively. Inset: schematic of dimer assembly from two monovalent droplets functionalized with complementary ‘arm’ sticky ends ( $\alpha$  on  $D_1$  and  $\alpha'$  on  $D_2$ ). The zoom-in images **(B)** and **(C)** show that each dimer is formed via the binding of complementary DNA origami patches. The top left, top right, bottom left and bottom right panel represents overlaid image, droplet channel, patch  $\alpha'$  channel and patch  $\alpha$  channel, respectively. All scale bars are 5  $\mu\text{m}$ .

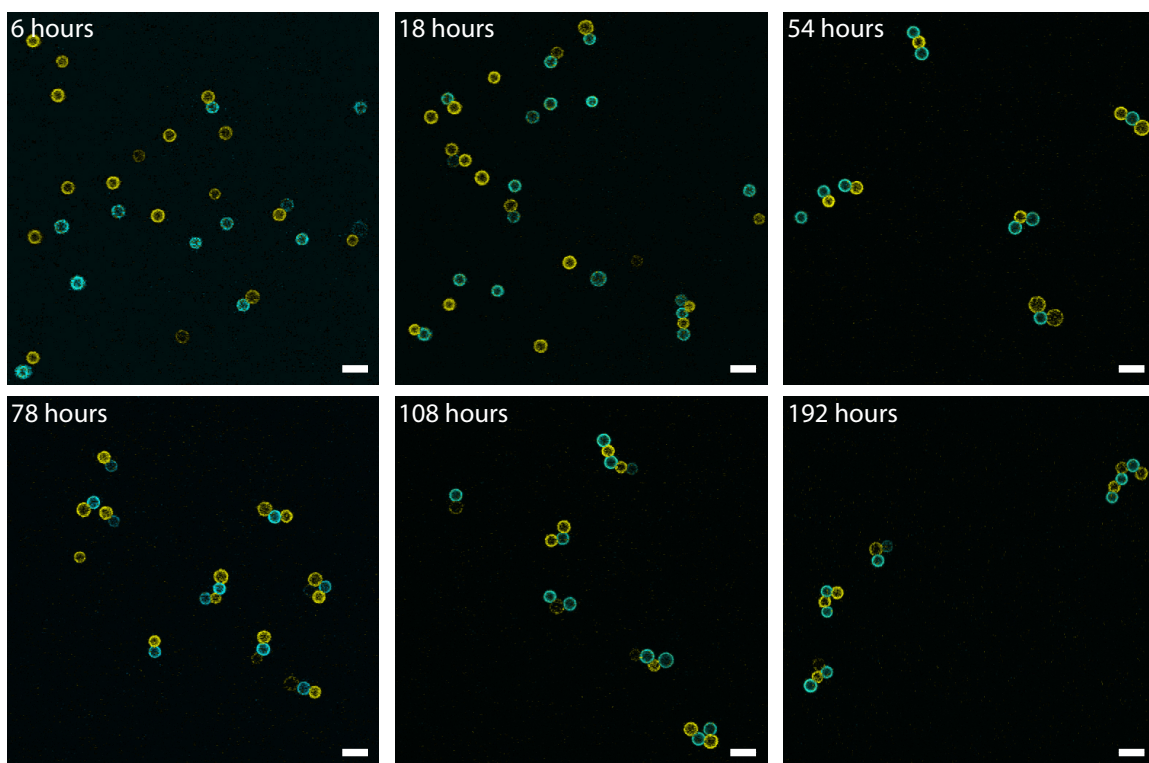

**Fig. S5.** Representative confocal images showing the growth of the polymers assembled from complementary divalent droplets. The two types of droplets are labeled either with SA-AF 488 (yellow) or with 546 (cyan). All scale bars are 10  $\mu\text{m}$ .

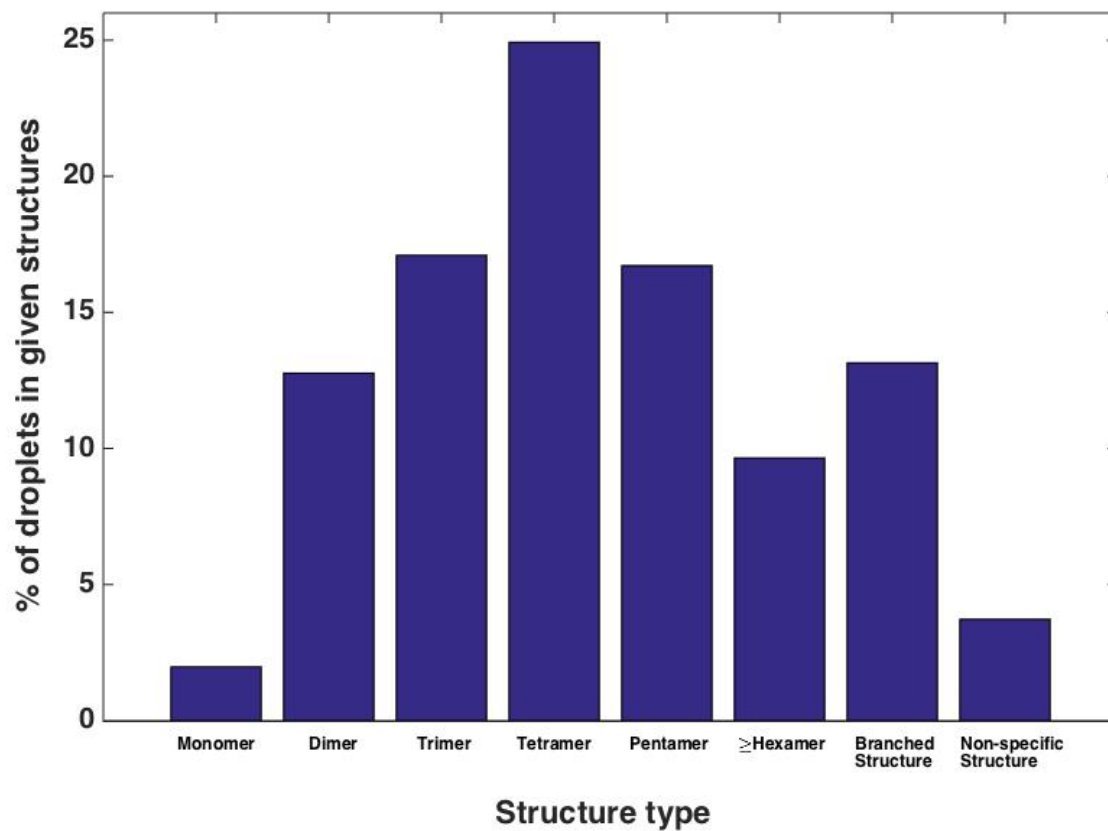

**Fig. S6.** Fractions of droplets in given structures after 192 hours of incubation.



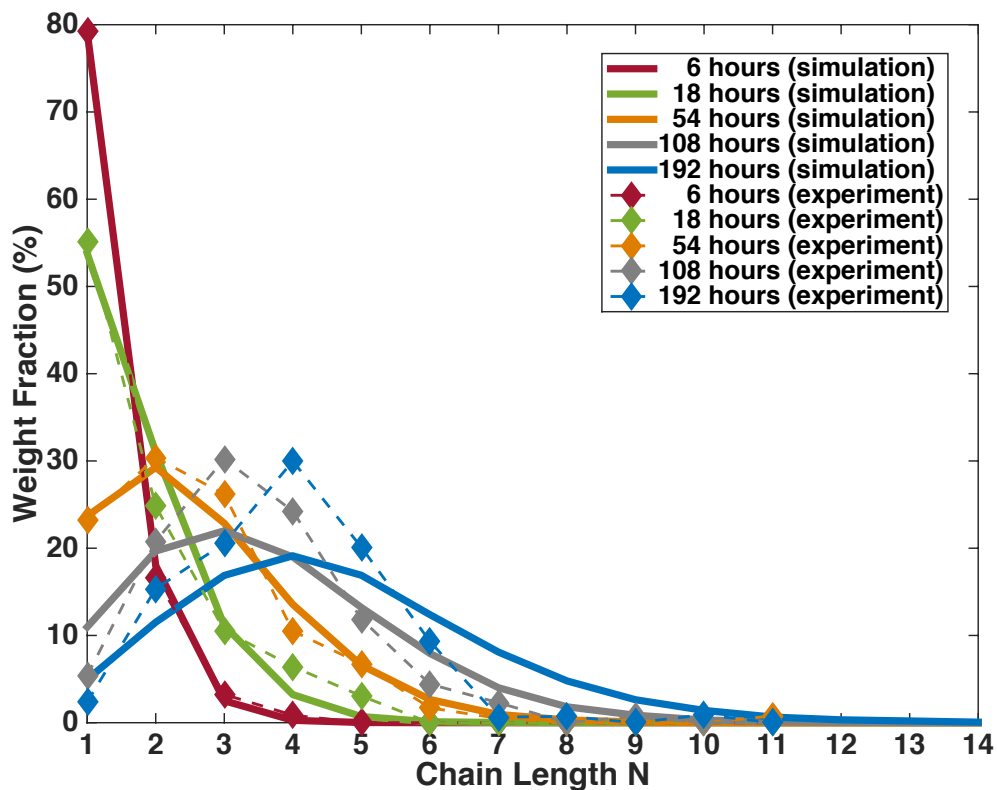

**Fig. S7.** A comparison between Monte Carlo simulation of the chain length distributions and experimental results at various time points. At each time point, the numbers of droplets in chains of various lengths are used to calculate the weight fractions. Note in experiments there is a significant reduction of long chains at long times as compared to the Monte Carlo simulation.

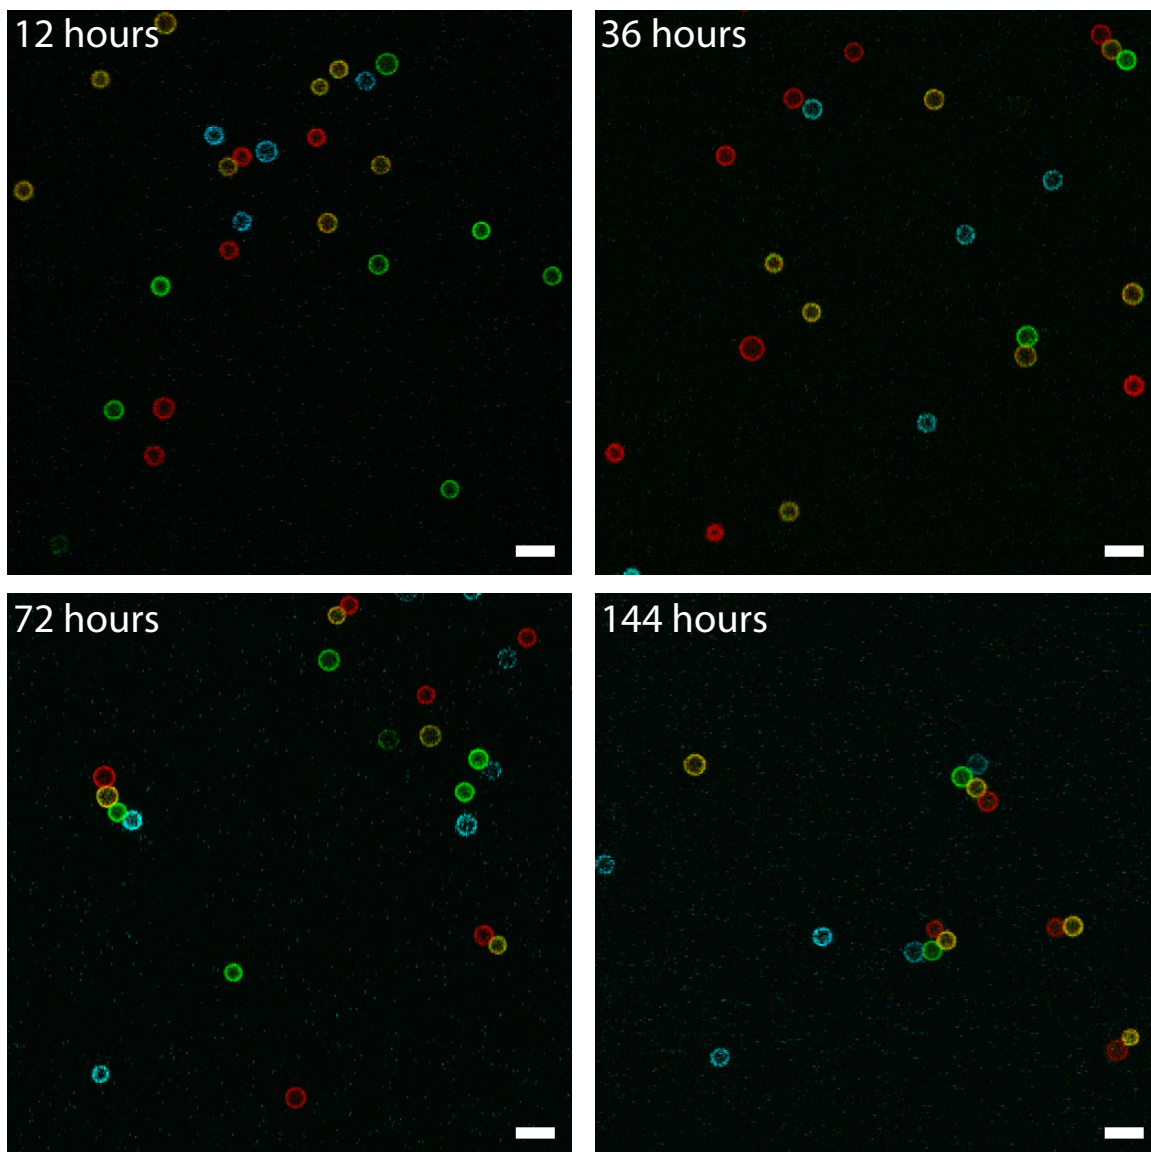

**Fig. S8.** Representative confocal images showing the growth of tetramers assembled from four types of droplets with patches bearing pre-programmed binding specificity. The four types of droplets are: red monovalent droplets equipped with one patch  $\alpha$ , yellow divalent droplets equipped with one patch  $\alpha'$  and one patch  $\beta$ , green divalent droplets equipped with one patch  $\beta'$  and one patch  $\gamma$  and blue monovalent droplets equipped with one patch  $\gamma'$ , respectively. All scale bars are 10  $\mu\text{m}$ .



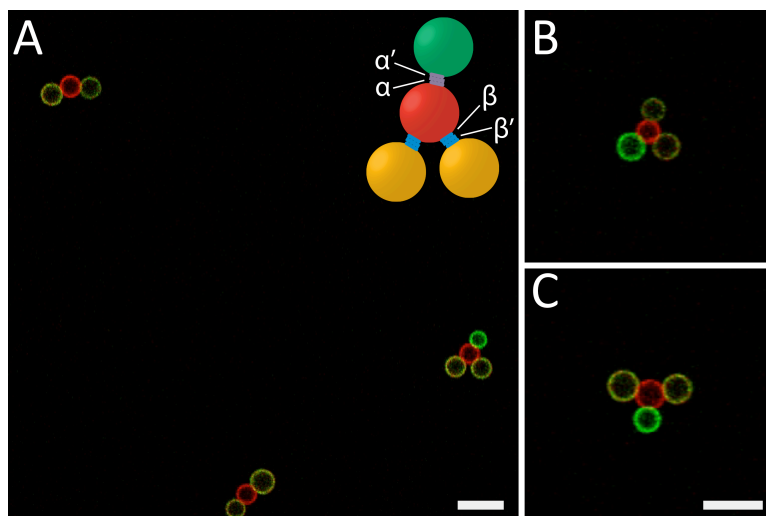

**Fig. S9.** Representative confocal images showing the hetero trivalent clusters assembled from three types of droplets with patches bearing pre-programmed binding specificity after 102 hours of incubation. The three types of droplets are: red (core) trivalent droplets equipped with one patch  $\alpha$  and two patch  $\beta$ , green monovalent droplets equipped with one patch  $\alpha'$  and yellow monovalent droplets equipped with patch  $\beta'$ , respectively. All scale bars are 10  $\mu\text{m}$ .

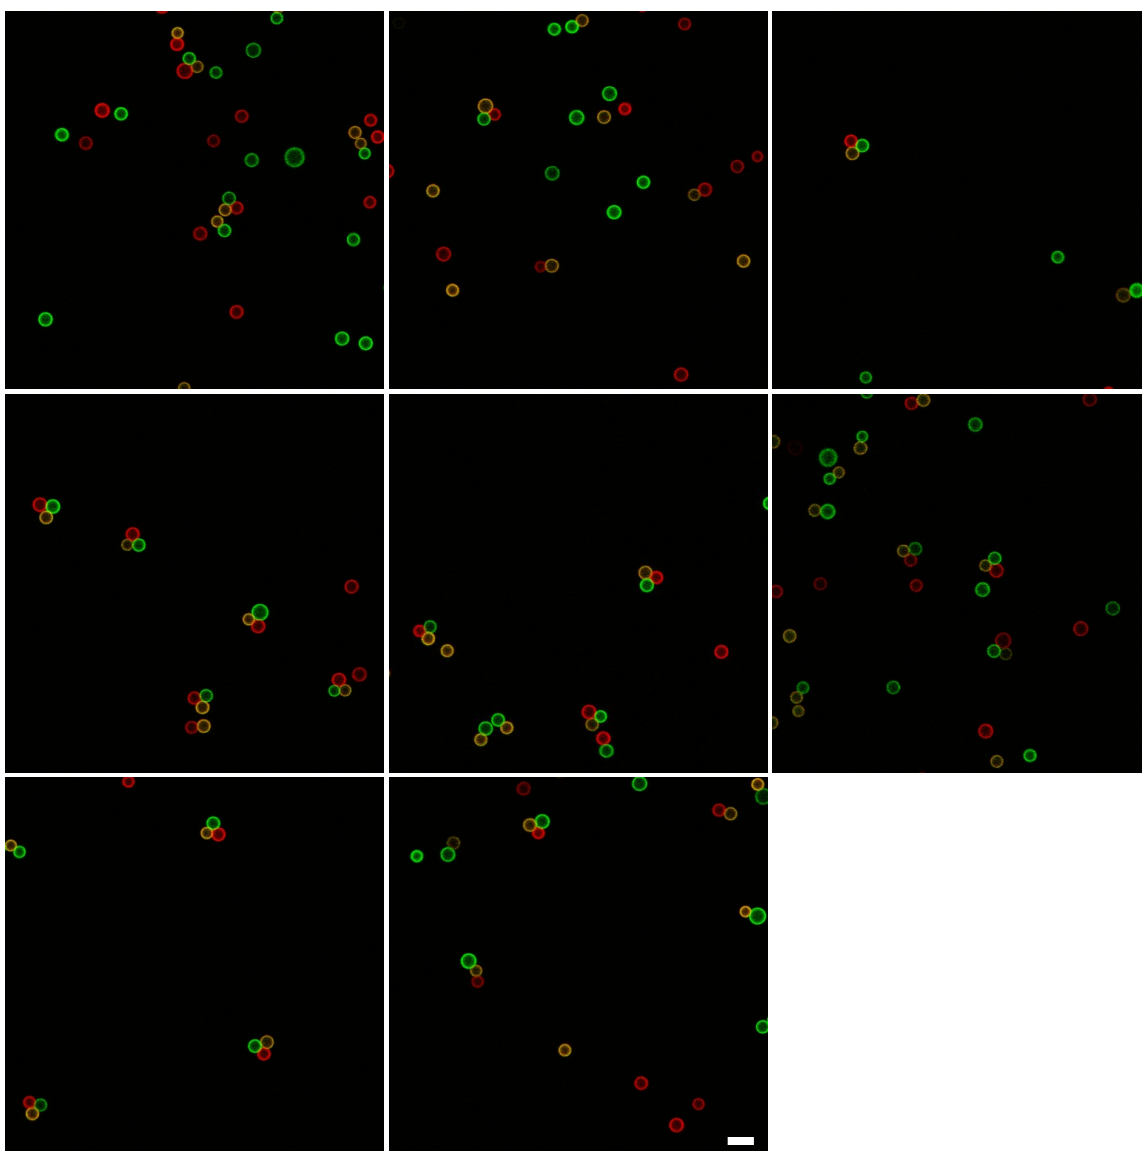

**Fig. S10.** Representative confocal images of the ‘triangles’ formed after adding the linker strands. 19 ‘triangles’ were counted with 1 linear trimer failed to fold, which could be caused by the fact that the sticky ends on “head” and “tail” of a trimer are both covered by linker strands. Scale bar is 10  $\mu\text{m}$ .

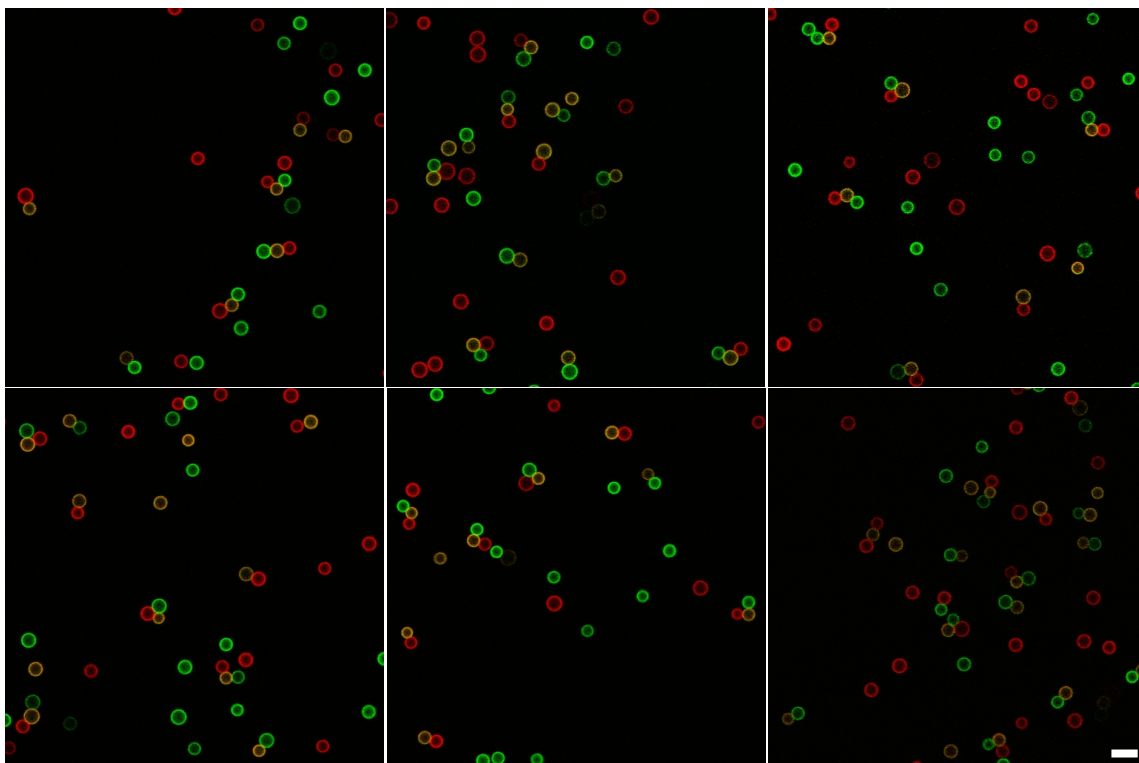

**Fig. S11.** Representative confocal images of the unfolded linear trimers formed 4 hours after adding the displacing strands. 16 linear trimers were counted with 4 ‘triangles’ stayed unfold, which might be due to the slow kinetics for all the linkers to be unzipped via toehold strand displacement reaction. Scale bar is 10  $\mu\text{m}$ .

**Table S1. Staple sequences of cross DNA origami**

| Name    | Sequence                                       |
|---------|------------------------------------------------|
| CO-M-1  | AGC TAA TGC AGA ACG CGC CTG TTT TAA TAT CC     |
| CO-M-2  | CAT CCT AAT TTG AAG CCT TAA ATC TTT TAT CC     |
| CO-M-3  | TGA ATC TTG AGA GAT AAC CCA CAA AAC AAT GA     |
| CO-M-4  | AAT AGC AAT AGA TGG GCG CAT CGT ACC GTA TC     |
| CO-M-5  | GGC CTC AGC TTG CAT GCC TGC AGG GAA TTC GT     |
| CO-M-6  | AAT CAT GGT GGT TTT TCT TTT CAC CCG CCT GG     |
| CO-M-7  | CCC TGA GAG AGT TGC AGC AAG CGG GTA TTG GG     |
| CO-M-8  | CGC CAG GGT CAT AGC TGT TTC CTG GAC GGC CA     |
| CO-M-9  | GTG CCA AGG AAG ATC GAC ATC CAG ATA GGT TA     |
| CO-M-10 | CGT TGG TGT AGC TAT CTT ACC GAA TTG AGC GC     |
| CO-M-11 | TAA TAT CAA CCT TCG CTA ACG AGC CCG ACT TG     |
| CO-M-12 | CGG GAG GTT TTA CGA GCA TGT AGA ACA TGT TC     |
| CO-M-13 | CTG TCC AGA CGA CGA CAA TAA ACA AAC CAA TC     |
| CO-M-14 | AAT AAT CGC GTT TTA GCG AAC CTC GTC TTT CC     |
| CO-M-15 | AGA GCC TAC AAA GTC AGA GGG TAA GCC CTT TT     |
| CO-M-16 | TAA GAA AAG ATT GAC CGT AAT GGG CCA GCT TT     |
| CO-M-17 | CCG GCA CCC ACG ACG TTG TAA AAC TGT GAA AT     |
| CO-M-18 | TGT TAT CCG GGA GAG GCG GTT TGC TCC ACG CT     |
| CO-M-19 | GGT TTG CCC CAG CAG GCG AAA ATC AAT CGG CC     |
| CO-M-20 | AAC GCG CGG CTC ACA ATT CCA CAC CCA GGG TT     |
| CO-M-21 | TTC CCA GTG CTT CTG GTG CCG GAA GTG GGA AC     |
| CO-M-22 | AAA CGG CGG TAA GCA GAT AGC CGA AAC TGA AC     |
| CO-M-23 | ACC CTG AAA TTT GCC AGT TAC AAA TTC TAA GA     |
| CO-M-24 | ACG CGA GGG CTG TCT TTC CTT ATC AAG TAA TT     |
| CO-M-25 | AAT ATA AAG TAC CGA CAA AAG GTA ATT CCA AG     |
| CO-M-26 | AAC GGG TAG AAG GCT TAT CCG GTA ATA AAC AG     |
| CO-M-27 | CCA TAT TAA TTA GAC GGG AGA ATT ACA AAG TTA CC |
| CO-M-28 | GTC GGA TTC TCC ACC AGG CA                     |
| CO-M-29 | AAG CGC CAA TTA AGT TGG GTA ACG AAC ATA CG     |
| CO-M-31 | CCT GTC GTG CAT AAA GTG TAA AGC GAT GTG CT     |
| CO-M-32 | GCA AGG CGT TCG CCA TTC AGG CTG CGC AAC TG     |
| CO-M-33 | GGA AGC GCT TTA TCC CAA TCC AAA AAG CAA AT     |
| CO-M-35 | AGG CAT TTT CGA GCC AGT ACT CAT CG             |
| CO-M-36 | AGA ACA AGT ACC GCG CCC AAT AGC TAA GAA AC     |
| CO-M-37 | GAT TTT TTA CAG AGA GAA TAA CAT AAA AAC AG     |
| CO-M-39 | CCT AAT GAA CTG CCC GCT TTC CAG CCC TTA TA     |
| CO-M-42 | TTG CGC TCG TGA GCT AAC TCA CAT GAT AGC CC     |
| CO-M-43 | TAT TAC GCG GCG ATC GGT GCG GGC GAG GAT TT     |
| CO-M-44 | CAG CCT TTG TTT AAC GTC AAA AAT TTT CAA TT     |

|         |                                                |
|---------|------------------------------------------------|
| CO-M-45 | GGA ATC ATC AAG CCG TTT TTA TTT GTT ATA TA     |
| CO-M-47 | ACT ATA TGC TCC GGC TTA GGT TGG TCA TCG TA     |
| CO-M-48 | ACC TGA GCA GAG GCG AAT TAT TCA GAA AAT AG     |
| CO-M-49 | AGA AGT ATA ATA GAT AAT ACA TTT CTC TTC GC     |
| CO-M-50 | TAA AAC ATC TTT AAT GCG CGA ACT TAA TTG CG     |
| CO-M-51 | CTA TTA GTC GCC ATT AAA AAT ACC ATA GAT TA     |
| CO-M-52 | GAG CCG TCT AGA CTT TAC AAA CAA TTC GAC AA     |
| CO-M-54 | TTT TTA ACT AAA TGC TGA TGC AAA ATT GAG AA     |
| CO-M-56 | CAA GAC AAA AAT CAT AGG TCT GAG ACA AAC AT     |
| CO-M-57 | CAA GAA AAA TTG CTT TGA ATA CCA AGT TAC AA     |
| CO-M-58 | CTC GTA TTG GTG CAC TAA CAA CTA GAA CGA AC     |
| CO-M-60 | TGC TGG TAA TAT CCA GAA CAA TAT AAG CGT AA     |
| CO-M-61 | GAA TAC GTG AAG ATA AAA CAG AGG ATC TAA AA     |
| CO-M-62 | TAT CTT TAA AAT CCT TTG CCC GAA CCG CGA CCT GC |
| CO-M-63 | CGA AAC AAA GTA ATA ACG GA                     |
| CO-M-64 | TTC GCC TGC AAA ATT AAT TAC ATT AAT AGT GA     |
| CO-M-66 | ATA TGC GTT ATA CAA ATT CTT ACC TTT TCA AA     |
| CO-M-67 | TAT ATT TTG ACG CTG AGA AGA GTC TAA CAA TT     |
| CO-M-68 | TGA TTT GAT ACA TCG GGA GAA ACA CAA CGG AG     |
| CO-M-70 | ATT TTA AAG GAA TTG AGG AAG GTT TGA GGC GG     |
| CO-M-71 | TCA GTA TTA ACC CTT CTG ACC TGA TAC CGC CA     |
| CO-M-72 | GCC ATT GCA ACA GGA AAA ACG CTC TGG CCA AC     |
| CO-M-73 | AGA GAT AG AAC ACC GC CTG CAA CA AAA TCA AC    |
| CO-M-74 | AGT AGA AAA GTT TGA GTA ACA TTA                |
| CO-M-76 | GTA CCT TTA TTA CCT TTT TTA ATG CGA TAG CT     |
| CO-M-77 | TAG ATT AAA GTT AAT TCG ATC TTC TTA GTA TC     |
| CO-M-78 | TCA TAA TTA CTA GAA AAA GCC TGT TGA CCT AA     |
| CO-M-79 | ATT TAA TGA TCC TTG AAA ACA TAG GAA ACA GT     |
| CO-M-80 | ACA TAA ATA CGT CAG ATG AAT ATA TGG AAG GA     |
| CO-M-81 | ATT GAA CCA ATA TAA TCC TGA TTG TCA TTT TG     |
| CO-M-82 | CGG AAC AAT ATC TGG TCA GTT GGC GTG CCA CG     |
| CO-M-83 | CTG AGA GCA ATA AAA GGG ACA TTC ATG GAA AT     |
| CO-M-84 | ACC TAC ATT TTG ACG CTC AAT CGT CAG TCA CA     |
| CO-M-85 | CGA CCA GTC AGC AGC AAA TGA AAA TCA AAC CC     |
| CO-M-86 | TCA ATC AAA GAA ACC ACC AGA AGG ATG ATG GC     |
| CO-M-87 | AAT TCA TCA ACC ATA TCA AAA TTA TAG ATT TT     |
| CO-M-88 | CAG GTT TAC AAT ATA TGT GAG TGA TTA ATT TT     |
| CO-M-89 | CCC TTA GAG TTT GAA ATA CCG ACC CAC CGG AA     |
| CO-M-90 | ATA AGC AAA AAT TCG CGT TAA ATT TTT GTT AA     |
| CO-M-91 | CTC ATA TAA AAG ATT CAA AAG GGT AAG ATT GT     |
| CO-M-92 | CGA ACG AGA AAT GGT CAA TAA CCT TTA GAA CC     |

|          |                                                                               |
|----------|-------------------------------------------------------------------------------|
| CO-M-93  | ATA GTC AGG GAA GCC CGA AAG ACT CAA TTC TG                                    |
| CO-M-94  | ACC ACA TTT TAC GAG GCA TAG TAA TGA CTA TT                                    |
| CO-M-95  | CAA GAG TAA ATC AAC GTA ACA AAG TTA GGA AT                                    |
| CO-M-96  | TCA GTG AAG CGC ATA GGC TGG CTG ACC TTC AT                                    |
| CO-M-97  | CTA TCA TAA TTC ATC AGT TGA GAT CTG CTC AT                                    |
| CO-M-98  | CGC GTT TTA ATC AGG TCT TTA CCC GAG CAA CA                                    |
| CO-M-99  | ATA TTT TCT GTA ACA GTT GAT TCC TCA AAT AT                                    |
| CO-M-100 | CCG GAG ACG CAA GGA TAA AAA TTT GTT TAG CT                                    |
| CO-M-101 | ATC AGC TCA AGC CCC AAA AAC AGG GAG AAA GG                                    |
| CO-M-102 | AAT CAG AAA TTT TTT AAC CAA TAG GAA CGC CA                                    |
| CO-M-103 | ATT TCA ACA GTC AAA TCA CCA TCA CGG TTG AT                                    |
| CO-M-104 | TCA TTC CAA TTT GGG GCG CGA GCT AAG CCT TT                                    |
| CO-M-105 | AAA TCA AAA ATT CGA GCT TCA AAG TGG AAG TT                                    |
| CO-M-106 | GTA GAA AGA CCC TCG TTT ACC AGA ATG ACC AT                                    |
| CO-M-107 | CAG ACC AGT AAG GCT TGC CCT GAC TAT TAC AG                                    |
| CO-M-108 | CAG AAC GAG AAA GAG GAC AGA TGA ACG GTG TA                                    |
| CO-M-109 | AAA ACC AAA CTA ACG GAA CAA CAT GAG AAC AC                                    |
| CO-M-110 | AAC CGG AAG AGT TCA GAA AAC GAG ACG ACG ATA                                   |
| CO-M-111 | GGC ATC AAA CTA AAG TAC GGT GTC CGA ACC AG                                    |
| CO-M-112 | TTC AAC CGA ATA CTT TTG CGG GAG GAA AAG GT                                    |
| CO-M-113 | TCA AAA ATT CAA TCA TAT GTA CCC ATA TGA TA                                    |
| CO-M-115 | GAC CCT GTT TCT AGC TGA TAA ATT TCG TAA AA                                    |
| CO-M-116 | AAC AGT TAA CCA GAG CCG CCG CCA GAA CCG CC                                    |
| CO-M-118 | TAA AAC GAA ATA GCG AGA GGC TTT CTC AAA TG                                    |
| CO-M-119 | CCA ACT TTG TAG TAA ATT GGG CTT TAC GTT AA                                    |
| CO-M-121 | AGA GTA CCT ATT CAT TGA ATC CCC TGC AAA AG                                    |
| CO-M-122 | CAT CCA ATG GTG CTG TAG CTC AAC ATG TTT                                       |
| CO-M-123 | AGA GGG TAA ATC GGT TGT ACC AAA AGC ATT AA                                    |
| CO-M-124 | CCA GCT TTA ATC GAT GAA CGG TAA AAT GCC GG                                    |
| CO-M-125 | AAC AAG AGC ATC AAC ATT AAA TGT GAG CGA GTA ACA ACT TAA GGA AAC<br>CGA GGA AA |
| CO-M-127 | GTC ATA AAT TTA ATT GCT CCT TTT CTT AAT TG                                    |
| CO-M-128 | GTC AGG ACC CAG AGG GGG TAA TAG GCG GAA TC                                    |
| CO-M-129 | AAC GAG GCG CAG ACG GAA CTT TAA TCA TTG TGT TAT ACC A                         |
| CO-M-130 | GCG CCG ACT TTA AGA ACT GGC TCA AAT TAC CT                                    |
| CO-M-131 | CAA CGC CTG ATA GCG TCC AAT ACT TAA AAT GT                                    |
| CO-M-132 | TAT TAT TCT GCG GAT GGC TTA GAG GAT AAG AG                                    |
| CO-M-133 | CCT CAG AGA TTA AGC AAT AAA GCC GCA AAG AA                                    |
| CO-M-134 | CGT CAC CGG TCA TTG CCT GAG AGT CTA CAA AG                                    |
| CO-M-135 | GCT ATC AGA CTT GAG CCA TTT GGG ATT ATC AC                                    |
| CO-M-136 | TTA GCA AAC CAC CAC CCT CAG AGC ACC GCC AC                                    |
| CO-M-137 | GTC ATT TTT GAA ACA TGA AAG TAT TCG GAA CC                                    |

|              |                                                                               |
|--------------|-------------------------------------------------------------------------------|
| CO-M-138     | TTA GAC TGG TAG CAT TCC ACA GAC ACA AAC TA                                    |
| CO-M-139     | TAT GCG ATA ATG ACA ACA ACC ATC CGA TAG TT                                    |
| CO-M-140     | ATA ACC GAT CAT CTT TGA CCC CCA GCG ATT ATA CCA AGT TCA TGT TAC TTA<br>GCC GG |
| CO-M-142     | GAA CCA CCA TGC CCC CTG CCT ATT TAA GAG GC                                    |
| CO-M-143     | CCA GCA AAA GCC GCC ACC CTC AGA CGC CAC CA                                    |
| CO-M-144     | CGC AAT AAT AAC GGA ATA TTC ATT AAA GGT GAA ATT AGA G                         |
| CO-M-146     | GTA ACA CTC TCA AGA GAA GGA TTA GGA TTA                                       |
| CO-M-147     | AGA ATT TCG TAA CGA TCT AAA GTT CAT GTA CC                                    |
| CO-M-148     | TAA AAC ACT ATA TTC GGT CGC TGA TTT CGA GG                                    |
| CO-M-150     | TTT CCA GAC GGT TTA TCA GCT TGC GGC TTG CA                                    |
| CO-M-152     | AGC AAG GCA CCA GAG CCA CCA CCG GCA TTG AC                                    |
| CO-M-153     | AGA CTC CTT TGA GGG AGG GAA GGT TTA CCA TT                                    |
| CO-M-154     | TCA ACC GAT ATT ACG CAG TAT GTT AGC AAA CG                                    |
| CO-M-155     | TCA CCG GAC GGA AAC GTC ACC AAT GGC GAC AT                                    |
| CO-M-156     | GGG TCA GTG AGG CAG GTC AGA CGA AAT CAA AA                                    |
| CO-M-157     | GGG ATA GCG CTC AGT ACC AGG CGG TTT TAA CG                                    |
| CO-M-158     | AAT TGT ATC GTT AGT AAA TGA ATT CAT TTT CA                                    |
| CO-M-159     | CAA CCT AAA AGG CCG CTT TTG CGG GAG CCT TT                                    |
| CO-M-160     | CCC TCA GCT ACG TAA TGC CAC TAC GAA GGC AC                                    |
| CO-M-161     | GGG ATT TTA AAA AGG CTC CAA AAG GAT CGT CA                                    |
| CO-M-162     | CGT CGA GAT CAG AGC CAC CAC CCT TTC TGT AT                                    |
| CO-M-163     | GAT ATT CAG TGT ACT GGT AAT AAG ATA AGT GC                                    |
| CO-M-164     | CGA TAG CAT TTG CCA TCT TTT CAT TTG GCC TT                                    |
| CO-M-165     | TAG AAA ATG CGC CAA AGA CAA AAG GAA ACC AT                                    |
| CO-M-166     | GTT TAC CAA CAT ACA TAA AGG TGG CAA CAT AT                                    |
| CO-M-167     | TAT TAG CGG CAC CGT AAT CAG TAG TTC ATA TG                                    |
| CO-M-168     | ATA CAG GAC AAA CGA ATG GAT CTT AGC CCC CT                                    |
| CO-M-169     | CGC CAC CCG GGT TGA TAT AAG TAT TTT TGA TG                                    |
| CO-M-170     | TCT CCA AAG CTA AAC AAC TTT CAA CTC AGA AC                                    |
| CO-M-171     | GGG TAA AAA GCG AAA GAC AGC ATC GTT GAA AA                                    |
| CO-M-172     | GGT AGC AAT TCA TGA GGA AGT TTC CAT TAA AC                                    |
| CO-M-173     | GCG GAG TGA TAA TAA TTT TTT CAC GGA ACG AG                                    |
| CO-M-174     | ATA GGT GTC CTC AGA ACC GCC ACC CAG TTT CA                                    |
| CO-M-175     | CCA GAA TGA AGC GTC ATA CAT GGC AGC CCG GA                                    |
| CO-M-176     | TCA AGT TTC GGC ATT TTC GGT CAT CAT TAA AG                                    |
| CO-M-177     | AAA AGA AAC ACA ATC AAT AGA AAA CGA CAG AA                                    |
| CO-M-30*(1)  | AGC CGG AAG CCA GCT GCA TTA ATG CTG TTT GAT GGT GTC TTC CTG TAG               |
| CO-M-114*(1) | CTA GCA TGA ATT CGC GTC TGG CTG TTC CGA AAT CGG CAA AAT TCG GGA AA            |
| CO-M-38*(2)  | TTG GGA AGC AGC TGG CTT AAA GCT AGC TAT TTT TGA GAG ATC TGG AGC A             |

|                     |                                                                                |
|---------------------|--------------------------------------------------------------------------------|
| CO-M-126*(2)        | CTG AAT CTA AAT CAT ACA GGC AAG TCA GAG CAT GAA AGG GGC TGG GGT G              |
| CO-M-40*(3)         | AAT CAA AAG AAT AGC CCT TTA AAT ATG CAT TCT ACT AAT AGT AGT AAC ATT AT         |
| CO-M-41*(3)         | GAG ATA GGG TTG TCA GGA TTA G                                                  |
| CO-M-117*(3)        | CTT TAA ACC AAA CTC CAA CAG TTG AGT GTT GTT CGT AGA AGA ACT CAA ACT TTG AAT GG |
| CO-M-59*(4)         | CAC CAG CAG GCA CAG ATT TAA TTT CTC AAT CAT AAG GGA ACC GAA CTG A              |
| CO-M-120*(4)        | AAG TTT TGG TTG GGA AGA AAA ATC GAG ATG GTT CAA TAT TTA TCG GCC T              |
| CO-M-53*(5)         | AAT CGC GCA AAA GAA GTT AGT TAG CTT AAA CAG CTT GAT ACG CCC ACG C              |
| CO-M-141*(5)        | TGA GAC TCG AGT TTC GTC ACC AGT AGC CCT CAT ATG ATG AAA GAC TAC C              |
| CO-M-65*(5)         | ATT TAT CAA GAA CGC GAG AAA ACT AGT ATA AAG CCA ATA AAG AAT ACA C              |
| CO-M-149*(6)        | GGG AGT TAA ACG AAA GAG GCG TCG CTC AAC AGT AGG GCT TAT CCA ATC G              |
| CO-M-55*(7)         | TCG CCA TAT TTA ACA ACG TTG CGG GGT TTT AAG CCC AAT AGG AAC CTT GTC GTC        |
| CO-M-46*(7)         | CCA ACA GTG TGT GCC CGT ATA                                                    |
| CO-M-151*(7)        | AGG AGG TTG CCT TGA GTA ACA TAA TTT AGG CAG                                    |
| CO-M-34*(8)         | CAG ATA TAT TAA ACC ATA CGG AAA TTA CCC AAA AGA ACT GGC ATG ATT A              |
| CO-M-145*(8)        | TCC CTC AGA TCA CCA GTA GCA CCA AAA TAT TGT AGT ACC GCA ATA AGA G              |
| CO-M-69#            | TTT GGA TTA TAC CTG ATA AAT TGT GTC GAA ATC GTT ATT A                          |
| CO-M-75#            | ATT TGT ATC ATC GCT TCT GAA TTA CAG TAA CA                                     |
| FT-L1-Blunt (AT-U1) | TCC TGA ACA AGA AAA AAT CAA CAA TAG ATA AG                                     |
| FT-L2-Blunt (AT-U2) | TTG CAC CCA GCT ACA AAA GAT TAG TTG CTA TT                                     |
| FT-L3-Blunt (AT-U3) | AAT AAT AAG AGC AAG AGA ATT GAG TTA AGC CC                                     |
| FT-L4-Blunt (AT-U4) | GTT TGA GGG GAC GAC GAA CCG TGC ATC TGC CA                                     |
| FT-L5-Blunt (AT-U5) | CCC GGG TAC CGA GGT CTC GAC TCT AGA GGA TC                                     |
| FT-L6-Blunt (AT-U6) | AGC TGA TTG CCC TTC ACA GTG AGA CGG GCA AC                                     |
| FT-R1-Blunt (AT-D1) | GTT AAA TAA GAA TAA AGT GTG ATA AAT AAG GC                                     |
| FT-R2-Blunt (AT-D2) | AAA TCG TCG CTA TTA AAT AAC CTT GCT TCT GT                                     |
| FT-R3-Blunt (AT-D3) | AAA TAA AGA AAT TGC GTT AGC ACG TAA AAC AG                                     |
| FT-R4-Blunt (AT-D4) | TAT TCC TGA TTA TCA GAG CGG AAT TAT CAT CA                                     |
| FT-R5-Blunt (AT-D5) | TGC TGA ACC TCA AAT AAT CTA AAG CAT CAC CT                                     |
| FT-R6-Blunt (AT-D6) | ACA TTG GCA GAT TCA CCT GAA ATG GAT TAT TT                                     |
| FT-U1-Blunt (AT-R1) | AAT AAG TTT ATT TTG TCG CAA AGA CAC CAC GG                                     |
| FT-U2-Blunt (AT-R2) | TGT AGC GCG TTT TCA TGC CTT TAG CGT CAG AC                                     |
| FT-U3-Blunt (AT-R3) | AAT TTA CCG TTC CAG TGA AAG CGC AGT CTC TG                                     |
| FT-U4-Blunt (AT-R4) | GGT TTA GTA CCG CCA CAT CAC CGT ACT CAG GA                                     |
| FT-U5-Blunt (AT-R5) | ACT AAA GGA ATT GCG AAG AAT AGA AAG GAA CA                                     |
| FT-U6-Blunt (AT-R6) | GAG GAC TAA AGA CTT TCG GCT ACA GAG GCT TT                                     |
| FT-D1-Blunt (AT-L1) | CGT TAA TAT TTT GTT AAT ATT TAA ATT GTA AA                                     |
| FT-D2-Blunt (AT-L2) | TGA GTA ATG TGT AGG TTT TTA AAT GCA ATG CC                                     |
| FT-D3-Blunt (AT-L3) | ATT AGA TAC ATT TCG CTA GAT TTA GTT TGA CC                                     |



|                     |                                            |
|---------------------|--------------------------------------------|
| FT-D4-Blunt (AT-L4) | ATC AAA AAG ATT AAG AAA GCA AAG CGG ATT GC |
| FT-D5-Blunt (AT-L5) | ATA ACG CCA AAA GGA ACA ACT AAT GCA GAT AC |
| FT-D6-Blunt (AT-L6) | GGA TAT TCA TTA CCC AAT CTT CGA CAA GAA CC |

**Table S2. Biotinylated staples, leg sticky ends and arm sticky ends on DNA origami**

| Name              | Sequence                                                                              |
|-------------------|---------------------------------------------------------------------------------------|
| Biotin4T-CO-M-1   | AGC TAA TGC AGA ACG CGC CTG TTT TAA TAT CCC ATC CTA ATT TGA AGC TTT<br>T/3BioTEG/     |
| Biotin4T-CO-M-16  | TAA GAA AAG ATT GAC CGT AAT GGG CCA GCT TTC CGG CAC CCA CGA CGT TTT<br>T/3BioTEG/     |
| Biotin4T-CO-M-72  | GCC ATT GCA ACA GGA AAA ACG CTC TGG CCA ACG AGA TAG AAC ACC GC TTT<br>T/3BioTEG/      |
| Biotin4T-CO-M-87  | AAT TCA TCA ACC ATA TCA AAA TTA TAG ATT TTC AGG TTT ACA ATA TAT TTT<br>T/3BioTEG/     |
| Biotin4T-CO-M-92  | CGA ACG AGA AAT GGT CAA TAA CCT TTA GAA CCT TTT /3BioTEG/                             |
| Biotin4T-CO-M-107 | CAG ACC AGT AAG GCT TGC CCT GAC TAT TAC AG TTTT /3BioTEG/                             |
| Biotin4T-CO-M-165 | TAG AAA ATG CGC CAA AGA CAA AAG GAA ACC ATT TTT /3BioTEG/                             |
| Biotin4T-CO-M-174 | ATA GGT GTC CTC AGA ACC GCC ACC CAG TTT CAT TTT /3BioTEG/                             |
| Leg20-CO-M-19     | GGT TTG CCC CAG CAG GCG AAA ATC AAT CGG CCT TTT TTT TTT CGT AAG TGG<br>TGT TCC AAC TG |
| Leg20-CO-M-21     | TTC CCA GTG CTT CTG GTG CCG GAA GTG GGA ACT TTT TTT TTT CGT AAG TGG<br>TGT TCC AAC TG |
| Leg20-CO-M-23     | ACC CTG AAA TTT GCC AGT TAC AAA TTC TAA GAT TTT TTT TTT CGT AAG TGG<br>TGT TCC AAC TG |
| Leg20-CO-M-66     | ATA TGC GTT ATA CAA ATT CTT ACC TTT TCA AAT TTT TTT TTT CGT AAG TGG<br>TGT TCC AAC TG |
| Leg20-CO-M-68     | TGA TTT GAT ACA TCG GGA GAA ACA CAA CGG AGT TTT TTT TTT CGT AAG TGG<br>TGT TCC AAC TG |
| Leg20-CO-M-70     | ATT TTA AAG GAA TTG AGG AAG GTT TGA GGC GGT TTT TTT TTT CGT AAG TGG<br>TGT TCC AAC TG |
| S36-biotin        | CAT CGA ACA ATC CGG TCG AGT GCC ATG ATT TGT GAG/3BioTEG/                              |
| cS36-Arm-a11      | CTC ACA AAT CAT GGC ACT CGA CCG GAT TGT TCG ATG GAG ATT CCA GC                        |
| cS36-Arm-a'20     | CTC ACA AAT CAT GGC ACT CGA CCG GAT TGT TCG ATG AGC AGC AGA GCT GGA<br>ATC TC         |
| cS36-Arm-b11      | CTC ACA AAT CAT GGC ACT CGA CCG GAT TGT TCG ATG TCG TAC ATA AT                        |
| cS36-Arm-b'20     | CTC ACA AAT CAT GGC ACT CGA CCG GAT TGT TCG ATG ACG TCT GAT ATT ATG<br>TAC GA         |
| cS36-Arm-c11      | CTC ACA AAT CAT GGC ACT CGA CCG GAT TGT TCG ATG CCT TAG TGC TC                        |
| cS36-Arm-c'20     | CTC ACA AAT CAT GGC ACT CGA CCG GAT TGT TCG ATG CTA GGT CAC GAG CAC<br>TAA GG         |

**Table S3. Horizontal sticky ends on cross DNA origami**

| Name    | Sequence                                                |
|---------|---------------------------------------------------------|
| FT-A-L1 | TCC TGA ACA AGA AAA AAT CAA CAA TAG ATA AGA GCA T       |
| FT-A-L2 | TTG CAC CCA GCT ACA AAA GAT TAG TTG CTA TTG CAA A       |
| FT-A-L3 | ATC CTA ATA ATA AGA GCA AGA GAA TTG AGT TAA GCC CTA TGG |
| FT-A-L4 | GTC TTG TTT GAG GGG ACG ACG AAC CGT GCA TCT GCC AAA GGT |
| FT-A-L5 | CGA ATC CCG GGT ACC GAG GTC TCG ACT CTA GAG GAT C       |
| FT-A-L6 | CTG TTA GCT GAT TGC CCT TCA CAG TGA GAC GGG CAA C       |
| FT-A-R1 | CTG TTG TTA AAT AAG AAT AAA GTG TGA TAA ATA AGG C       |
| FT-A-R2 | CGA ATA AAT CGT CGC TAT TAA ATA ACC TTG CTT CTG T       |
| FT-A-R3 | GTC TTA AAT AAA GAA ATT GCG TTA GCA CGT AAA ACA GAA GGT |
| FT-A-R4 | ATC CTT ATT CCT GAT TAT CAG AGC GGA ATT ATC ATC ATA TGG |
| FT-A-R5 | TGC TGA ACC TCA AAT AAT CTA AAG CAT CAC CTG CAA A       |
| FT-A-R6 | ACA TTG GCA GAT TCA CCT GAA ATG GAT TAT TTA GCA T       |
| FT-A-U1 | AAT AAG TTT ATT TTG TCG CAA AGA CAC CAC GGA GTG T       |
| FT-A-U2 | TGT AGC GCG TTT TCA TGC CTT TAG CGT CAG ACG TTC A       |
| FT-A-U3 | TGA GTA ATT TAC CGT TCC AGT GAA AGC GCA GTC TCT GTC TAC |
| FT-A-U4 | CTA TCG GTT TAG TAC CGC CAC ATC ACC GTA CTC AGG AAC TTG |
| FT-A-U5 | GAC ATA CTA AAG GAA TTG CGA AGA ATA GAA AGG AAC A       |
| FT-A-U6 | CGT AAG AGG ACT AAA GAC TTT CGG CTA CAG AGG CTT T       |
| FT-A-D1 | CGT AAC GTT AAT ATT TTG TTA ATA TTT AAA TTG TAA A       |
| FT-A-D2 | GAC ATT GAG TAA TGT GTA GGT TTT TAA ATG CAA TGC C       |
| FT-A-D3 | CTA TCA TTA GAT ACA TTT CGC TAG ATT TAG TTT GAC CAC TTG |
| FT-A-D4 | TGA GTA TCA AAA AGA TTA AGA AAG CAA AGC GGA TTG CTC TAC |
| FT-A-D5 | ATA ACG CCA AAA GGA ACA ACT AAT GCA GAT ACG TTC A       |
| FT-A-D6 | GGA TAT TCA TTA CCC AAT CTT CGA CAA GAA CCA GTG T       |
| AT-A-U1 | TCC TGA ACA AGA AAA AAT CAA CAA TAG ATA AGA CAC T       |
| AT-A-U2 | TTG CAC CCA GCT ACA AAA GAT TAG TTG CTA TTT GAA C       |
| AT-A-U3 | ACT CAA ATA ATA AGA GCA AGA GAA TTG AGT TAA GCC CGT AGA |
| AT-A-U4 | GAT AGG TTT GAG GGG ACG ACG AAC CGT GCA TCT GCC ACA AGT |
| AT-A-U5 | ATG TCC CCG GGT ACC GAG GTC TCG ACT CTA GAG GAT C       |
| AT-A-U6 | TTA CGA GCT GAT TGC CCT TCA CAG TGA GAC GGG CAA C       |
| AT-A-D1 | TTA CGG TTA AAT AAG AAT AAA GTG TGA TAA ATA AGG C       |
| AT-A-D2 | ATG TCA AAT CGT CGC TAT TAA ATA ACC TTG CTT CTG T       |
| AT-A-D3 | GAT AGA AAT AAA GAA ATT GCG TTA GCA CGT AAA ACA GCA AGT |
| AT-A-D4 | ACT CAT ATT CCT GAT TAT CAG AGC GGA ATT ATC ATC AGT AGA |
| AT-A-D5 | TGC TGA ACC TCA AAT AAT CTA AAG CAT CAC CTT GAA C       |
| AT-A-D6 | ACA TTG GCA GAT TCA CCT GAA ATG GAT TAT TTA CAC T       |
| AT-A-R1 | AAT AAG TTT ATT TTG TCG CAA AGA CAC CAC GGA TGC T       |
| AT-A-R2 | TGT AGC GCG TTT TCA TGC CTT TAG CGT CAG ACT TTG C       |
| AT-A-R3 | AGG ATA ATT TAC CGT TCC AGT GAA AGC GCA GTC TCT GCC ATA |

|         |                                                         |
|---------|---------------------------------------------------------|
| AT-A-R4 | AAG ACG GTT TAG TAC CGC CAC ATC ACC GTA CTC AGG AAC CTT |
| AT-A-R5 | ATT CGA CTA AAG GAA TTG CGA AGA ATA GAA AGG AAC A       |
| AT-A-R6 | AAC AGG AGG ACT AAA GAC TTT CGG CTA CAG AGG CTT T       |
| AT-A-L1 | AAC AGC GTT AAT ATT TTG TTA ATA TTT AAA TTG TAA A       |
| AT-A-L2 | ATT CGT GAG TAA TGT GTA GGT TTT TAA ATG CAA TGC C       |
| AT-A-L3 | AAG ACA TTA GAT ACA TTT CGC TAG ATT TAG TTT GAC CAC CTT |
| AT-A-L4 | AGG ATA TCA AAA AGA TTA AGA AAG CAA AGC GGA TTG CCC ATA |
| AT-A-L5 | ATA ACG CCA AAA GGA ACA ACT AAT GCA GAT ACT TTG C       |
| AT-A-L6 | GGA TAT TCA TTA CCC AAT CTT CGA CAA GAA CCA TGC T       |
| FT-B-L1 | TCC TGA ACA AGA AAA AAT CAA CAA TAG ATA AG AGCAA        |
| FT-B-L2 | TTG CAC CCA GCT ACA AAA GAT TAG TTG CTA TT AACTA        |
| FT-B-L3 | CTGAG A ATA ATA AGA GCA AGA GAA TTG AGT TAA GCC C CATGC |
| FT-B-L4 | ATCTA G TTT GAG GGG ACG ACG AAC CGT GCA TCT GCC A TTTCA |
| FT-B-L5 | AATCA C CCG GGT ACC GAG GTC TCG ACT CTA GAG GAT C       |
| FT-B-L6 | CATAC A GCT GAT TGC CCT TCA CAG TGA GAC GGG CAA C       |
| FT-B-R1 | CATAC G TTA AAT AAG AAT AAA GTG TGA TAA ATA AGG C       |
| FT-B-R2 | AATCA A AAT CGT CGC TAT TAA ATA ACC TTG CTT CTG T       |
| FT-B-R3 | ATCTA A AAT AAA GAA ATT GCG TTA GCA CGT AAA ACA G TTTCA |
| FT-B-R4 | CTGAG T ATT CCT GAT TAT CAG AGC GGA ATT ATC ATC A CATGC |
| FT-B-R5 | TGC TGA ACC TCA AAT AAT CTA AAG CAT CAC CT AACTA        |
| FT-B-R6 | ACA TTG GCA GAT TCA CCT GAA ATG GAT TAT TT AGCAA        |
| FT-B-U1 | AAT AAG TTT ATT TTG TCG CAA AGA CAC CAC GG GGTAG        |
| FT-B-U2 | TGT AGC GCG TTT TCA TGC CTT TAG CGT CAG AC TTCAG        |
| FT-B-U3 | TCAGC A ATT TAC CGT TCC AGT GAA AGC GCA GTC TCT G AGAAT |
| FT-B-U4 | TGATG G GTT TAG TAC CGC CAC ATC ACC GTA CTC AGG A TACAA |
| FT-B-U5 | GTGCA A CTA AAG GAA TTG CGA AGA ATA GAA AGG AAC A       |
| FT-B-U6 | CGTCG G AGG ACT AAA GAC TTT CGG CTA CAG AGG CTT T       |
| FT-B-D1 | CGTCG C GTT AAT ATT TTG TTA ATA TTT AAA TTG TAA A       |
| FT-B-D2 | GTGCA T GAG TAA TGT GTA GGT TTT TAA ATG CAA TGC C       |
| FT-B-D3 | TGATG A TTA GAT ACA TTT CGC TAG ATT TAG TTT GAC C TACAA |
| FT-B-D4 | TCAGC A TCA AAA AGA TTA AGA AAG CAA AGC GGA TTG C AGAAT |
| FT-B-D5 | ATA ACG CCA AAA GGA ACA ACT AAT GCA GAT AC TTCAG        |
| FT-B-D6 | GGA TAT TCA TTA CCC AAT CTT CGA CAA GAA CC GGTAG        |
| AT-B-R1 | AAT AAG TTT ATT TTG TCG CAA AGA CAC CAC GG TTGCT        |
| AT-B-R2 | TGT AGC GCG TTT TCA TGC CTT TAG CGT CAG AC TAGTT        |
| AT-B-R3 | CTCAG A ATT TAC CGT TCC AGT GAA AGC GCA GTC TCT G GCATG |
| AT-B-R4 | TAGAT G GTT TAG TAC CGC CAC ATC ACC GTA CTC AGG A TGAAA |
| AT-B-R5 | TGATT A CTA AAG GAA TTG CGA AGA ATA GAA AGG AAC A       |
| AT-B-R6 | GTATG G AGG ACT AAA GAC TTT CGG CTA CAG AGG CTT T       |
| AT-B-L1 | GTATG C GTT AAT ATT TTG TTA ATA TTT AAA TTG TAA A       |
| AT-B-L2 | TGATT T GAG TAA TGT GTA GGT TTT TAA ATG CAA TGC C       |

|         |                                                         |
|---------|---------------------------------------------------------|
| AT-B-L3 | TAGAT A TTA GAT ACA TTT CGC TAG ATT TAG TTT GAC C TGAAA |
| AT-B-L4 | CTCAG A TCA AAA AGA TTA AGA AAG CAA AGC GGA TTG C GCATG |
| AT-B-L5 | ATA ACG CCA AAA GGA ACA ACT AAT GCA GAT AC TAGTT        |
| AT-B-L6 | GGA TAT TCA TTA CCC AAT CTT CGA CAA GAA CC TTGCT        |
| AT-B-U1 | TCC TGA ACA AGA AAA AAT CAA CAA TAG ATA AG CTACC        |
| AT-B-U2 | TTG CAC CCA GCT ACA AAA GAT TAG TTG CTA TT CTGAA        |
| AT-B-U3 | GCTGA A ATA ATA AGA GCA AGA GAA TTG AGT TAA GCC C ATTCT |
| AT-B-U4 | CATCA G TTT GAG GGG ACG ACG AAC CGT GCA TCT GCC A TTGTA |
| AT-B-U5 | TGCAC C CCG GGT ACC GAG GTC TCG ACT CTA GAG GAT C       |
| AT-B-U6 | CGACG A GCT GAT TGC CCT TCA CAG TGA GAC GGG CAA C       |
| AT-B-D1 | CGACG G TTA AAT AAG AAT AAA GTG TGA TAA ATA AGG C       |
| AT-B-D2 | TGCAC A AAT CGT CGC TAT TAA ATA ACC TTG CTT CTG T       |
| AT-B-D3 | CATCA A AAT AAA GAA ATT GCG TTA GCA CGT AAA ACA G TTGTA |
| AT-B-D4 | GCTGA T ATT CCT GAT TAT CAG AGC GGA ATT ATC ATC A ATTCT |
| AT-B-D5 | TGC TGA ACC TCA AAT AAT CTA AAG CAT CAC CT CTGAA        |
| AT-B-D6 | ACA TTG GCA GAT TCA CCT GAA ATG GAT TAT TT CTACC        |
| FT-C-L1 | TCC TGA ACA AGA AAA AAT CAA CAA TAG ATA AG CGTTA        |
| FT-C-L2 | TTG CAC CCA GCT ACA AAA GAT TAG TTG CTA TT AAAGT        |
| FT-C-L3 | TAGAC A ATA ATA AGA GCA AGA GAA TTG AGT TAA GCC C GAACC |
| FT-C-L4 | CAATG G TTT GAG GGG ACG ACG AAC CGT GCA TCT GCC A AGGTA |
| FT-C-L5 | CCTTG C CCG GGT ACC GAG GTC TCG ACT CTA GAG GAT C       |
| FT-C-L6 | TAGGA A GCT GAT TGC CCT TCA CAG TGA GAC GGG CAA C       |
| FT-C-R1 | TAGGA G TTA AAT AAG AAT AAA GTG TGA TAA ATA AGG C       |
| FT-C-R2 | CCTTG A AAT CGT CGC TAT TAA ATA ACC TTG CTT CTG T       |
| FT-C-R3 | CAATG A AAT AAA GAA ATT GCG TTA GCA CGT AAA ACA G AGGTA |
| FT-C-R4 | TAGAC T ATT CCT GAT TAT CAG AGC GGA ATT ATC ATC A GAACC |
| FT-C-R5 | TGC TGA ACC TCA AAT AAT CTA AAG CAT CAC CT AAAGT        |
| FT-C-R6 | ACA TTG GCA GAT TCA CCT GAA ATG GAT TAT TT CGTTA        |
| FT-C-U1 | AAT AAG TTT ATT TTG TCG CAA AGA CAC CAC GG AGTTT        |
| FT-C-U2 | TGT AGC GCG TTT TCA TGC CTT TAG CGT CAG AC GGTTG        |
| FT-C-U3 | GGTAC A ATT TAC CGT TCC AGT GAA AGC GCA GTC TCT G GTCTC |
| FT-C-U4 | TCTAT G GTT TAG TAC CGC CAC ATC ACC GTA CTC AGG A AAGCA |
| FT-C-U5 | GCTTA A CTA AAG GAA TTG CGA AGA ATA GAA AGG AAC A       |
| FT-C-U6 | CGTGT G AGG ACT AAA GAC TTT CGG CTA CAG AGG CTT T       |
| FT-C-D1 | CGTGT C GTT AAT ATT TTG TTA ATA TTT AAA TTG TAA A       |
| FT-C-D2 | GCTTA T GAG TAA TGT GTA GGT TTT TAA ATG CAA TGC C       |
| FT-C-D3 | TCTAT A TTA GAT ACA TTT CGC TAG ATT TAG TTT GAC C AAGCA |
| FT-C-D4 | GGTAC A TCA AAA AGA TTA AGA AAG CAA AGC GGA TTG C GTCTC |
| FT-C-D5 | ATA ACG CCA AAA GGA ACA ACT AAT GCA GAT AC GGTTG        |
| FT-C-D6 | GGA TAT TCA TTA CCC AAT CTT CGA CAA GAA CC AGTTT        |
| AT-C-R1 | AAT AAG TTT ATT TTG TCG CAA AGA CAC CAC GG TAACG        |

|         |                                                          |
|---------|----------------------------------------------------------|
| AT-C-R2 | TGT AGC GCG TTT TCA TGC CTT TAG CGT CAG AC ACTTT         |
| AT-C-R3 | GTCTA A ATT TAC CGT TCC AGT GAA AGC GCA GTC TCT G GGTTTC |
| AT-C-R4 | CATTG G GTT TAG TAC CGC CAC ATC ACC GTA CTC AGG A TACCT  |
| AT-C-R5 | CAAGG A CTA AAG GAA TTG CGA AGA ATA GAA AGG AAC A        |
| AT-C-R6 | TCCTA G AGG ACT AAA GAC TTT CGG CTA CAG AGG CTT T        |
| AT-C-L1 | TCCTA C GTT AAT ATT TTG TTA ATA TTT AAA TTG TAA A        |
| AT-C-L2 | CAAGG T GAG TAA TGT GTA GGT TTT TAA ATG CAA TGC C        |
| AT-C-L3 | CATTG A TTA GAT ACA TTT CGC TAG ATT TAG TTT GAC C TACCT  |
| AT-C-L4 | GTCTA A TCA AAA AGA TTA AGA AAG CAA AGC GGA TTG C GGTTTC |
| AT-C-L5 | ATA ACG CCA AAA GGA ACA ACT AAT GCA GAT AC ACTTT         |
| AT-C-L6 | GGA TAT TCA TTA CCC AAT CTT CGA CAA GAA CC TAACG         |
| AT-C-U1 | TCC TGA ACA AGA AAA AAT CAA CAA TAG ATA AG AAACCT        |
| AT-C-U2 | TTG CAC CCA GCT ACA AAA GAT TAG TTG CTA TT CAACC         |
| AT-C-U3 | GTACC A ATA ATA AGA GCA AGA GAA TTG AGT TAA GCC C GAGAC  |
| AT-C-U4 | ATAGA G TTT GAG GGG ACG ACG AAC CGT GCA TCT GCC A TGCTT  |
| AT-C-U5 | TAAGC C CCG GGT ACC GAG GTC TCG ACT CTA GAG GAT C        |
| AT-C-U6 | ACACG A GCT GAT TGC CCT TCA CAG TGA GAC GGG CAA C        |
| AT-C-D1 | ACACG G TTA AAT AAG AAT AAA GTG TGA TAA ATA AGG C        |
| AT-C-D2 | TAAGC A AAT CGT CGC TAT TAA ATA ACC TTG CTT CTG T        |
| AT-C-D3 | ATAGA A AAT AAA GAA ATT GCG TTA GCA CGT AAA ACA G TGCTT  |
| AT-C-D4 | GTACC T ATT CCT GAT TAT CAG AGC GGA ATT ATC ATC A GAGAC  |
| AT-C-D5 | TGC TGA ACC TCA AAT AAT CTA AAG CAT CAC CT CAACC         |
| AT-C-D6 | ACA TTG GCA GAT TCA CCT GAA ATG GAT TAT TT AAACCT        |

**Table S4. Sticky-end sequences on Emulsion Droplets**

| Name         | Sequence                                                                      |
|--------------|-------------------------------------------------------------------------------|
| S36-biotin   | CAT CGA ACA ATC CGG TCG AGT GCC ATG ATT TGT GAG/3BioTEG/                      |
| cS36-cLeg20  | CTC ACA AAT CAT GGC ACT CGA CCG GAT TGT TCG ATG CAG TTG GAA CAC CAC TTA<br>CG |
| Linker-a20   | AGA AAG GAA ACG ATG AGG TT CGT AAG TGG TGT TCC AAC TG                         |
| Linker-b20   | GGT TTA ACC AGT GAT CCA TG CGT AAG TGG TGT TCC AAC TG                         |
| cLinker-a'20 | AAC CTC ATC GTT TCC TTT CT CTC ACA AAT CAT GGC ACT CGA CCG GAT TGT TCG<br>ATG |
| cLinker-b'10 | TGG TTA AAC C CAT CGA ACA ATC CGG TCG AGT GCC ATG ATT TGT GAG                 |
| DS17         | CATGGATCACTGGTTAA                                                             |

**Table S5. Statistics of the divalent droplet polymerization\***

|                         | 6 hours | 18 hours | 36 hours | 54 hours | 78 hours | 108 hours | 192 hours                                  |
|-------------------------|---------|----------|----------|----------|----------|-----------|--------------------------------------------|
| Non-Specific structures | 4       | 14       | 5        | 7        | 21       | 33        | 49<br>(18 non-specifically bound droplets) |
| Branched structures     | 0       | 4        | 28       | 27       | 36       | 77        | 173<br>(21 “branching” droplets)           |
| Monomer                 | 735     | 720      | 388      | 327      | 187      | 66        | 26                                         |
| Dimer                   | 154     | 318      | 278      | 428      | 268      | 254       | 168                                        |
| Trimer                  | 30      | 138      | 165      | 369      | 294      | 369       | 225                                        |
| Tetramer                | 8       | 80       | 124      | 148      | 200      | 296       | 328                                        |
| Pentamer                | 0       | 40       | 85       | 95       | 120      | 145       | 220                                        |
| Hexamer                 | 0       | 6        | 24       | 24       | 48       | 54        | 102                                        |
| Heptamer                | 0       | 0        | 0        | 7        | 28       | 28        | 7                                          |
| Octamer                 | 0       | 0        | 8        | 0        | 8        | 0         | 8                                          |
| Nonamer                 | 0       | 0        | 0        | 0        | 9        | 9         | 0                                          |
| Decamer                 | 0       | 0        | 0        | 0        | 0        | 0         | 10                                         |
| Undecamer               | 0       | 0        | 0        | 11       | 0        | 0         | 0                                          |
| Dodecamer               | 0       | 0        | 0        | 0        | 0        | 0         | 0                                          |
| Tridecamer              | 0       | 0        | 0        | 0        | 0        | 0         | 0                                          |
| Tetradecamer            | 0       | 0        | 0        | 0        | 0        | 0         | 0                                          |
| Total number counted    | 931     | 1320     | 1105     | 1443     | 1219     | 1318      | 1316                                       |

\* In the statistics, the numbers of droplets in various targeted/unexpected structures were counted.



**Table S6. Statistics of linear trimers (ABC structure)**

|        | Unreacted monomers |    |    | Specific assemblies |    |     | NSA* | Total number |    |    | Yield of linear trimers ** |
|--------|--------------------|----|----|---------------------|----|-----|------|--------------|----|----|----------------------------|
|        | A                  | B  | C  | AB                  | BC | ABC | AA   | A            | B  | C  |                            |
| Number | 33                 | 13 | 21 | 7                   | 8  | 40  | 1    | 82           | 68 | 69 | 59%                        |

\* Here NSA refers to non-specific assemblies. From our observations, we only found one non-specifically formed product (AA).

\*\* The yield of linear trimers is calculated as: the number of ABC / the total number of B = 59%.

**Movie S1.**

Low-magnification video of monovalent droplets diffusing at capillary top surface (2D).

**Movie S2.**

Low-magnification video of divalent droplets diffusing at capillary top surface (2D).

**Movie S3.**

Low-magnification video of trivalent droplets diffusing at capillary top surface (2D).

**Movie S4.**

Long 'alternating copolymers' wiggling at capillary top surface (2D).

**Movie S5.**

Real-time capture of a linear trimer folding into a 'triangle'.

**Movie S6.**

Real-time capture of a 'triangle' unfolding to a linear trimer.

## References

1. Wu KT, *et al.* (2013) Kinetics of DNA-coated sticky particles. *Phys. Rev. E* 88:022304.
2. Lee NK, *et al.* (2008) Ligand-receptor interactions in chains of colloids: when reactions are limited by rotational diffusion. *Langmuir* 24:1296-1307.
3. Joshi D, *et al.* (2016) Kinetic control of the coverage of oil droplets by DNA-functionalized colloids. *Sci. Adv.* 2, E1600881.
